# Supplementary material for: Self-induced mechanical stress can trigger biofilm formation in uropathogenic Escherichia coli
Source: PubMed Central journal article supplement (PMC6173693; doi:10.1038/s41467-018-06552-z), 2018-10-05
Supplement: 41467_2018_6552_MOESM1_ESM.pdf [file 41467_2018_6552_MOESM1_ESM.pdf]

1 **Self-induced mechanical stress can trigger biofilm formation in uropathogenic *Escherichia coli***

2 **Chu et al.**

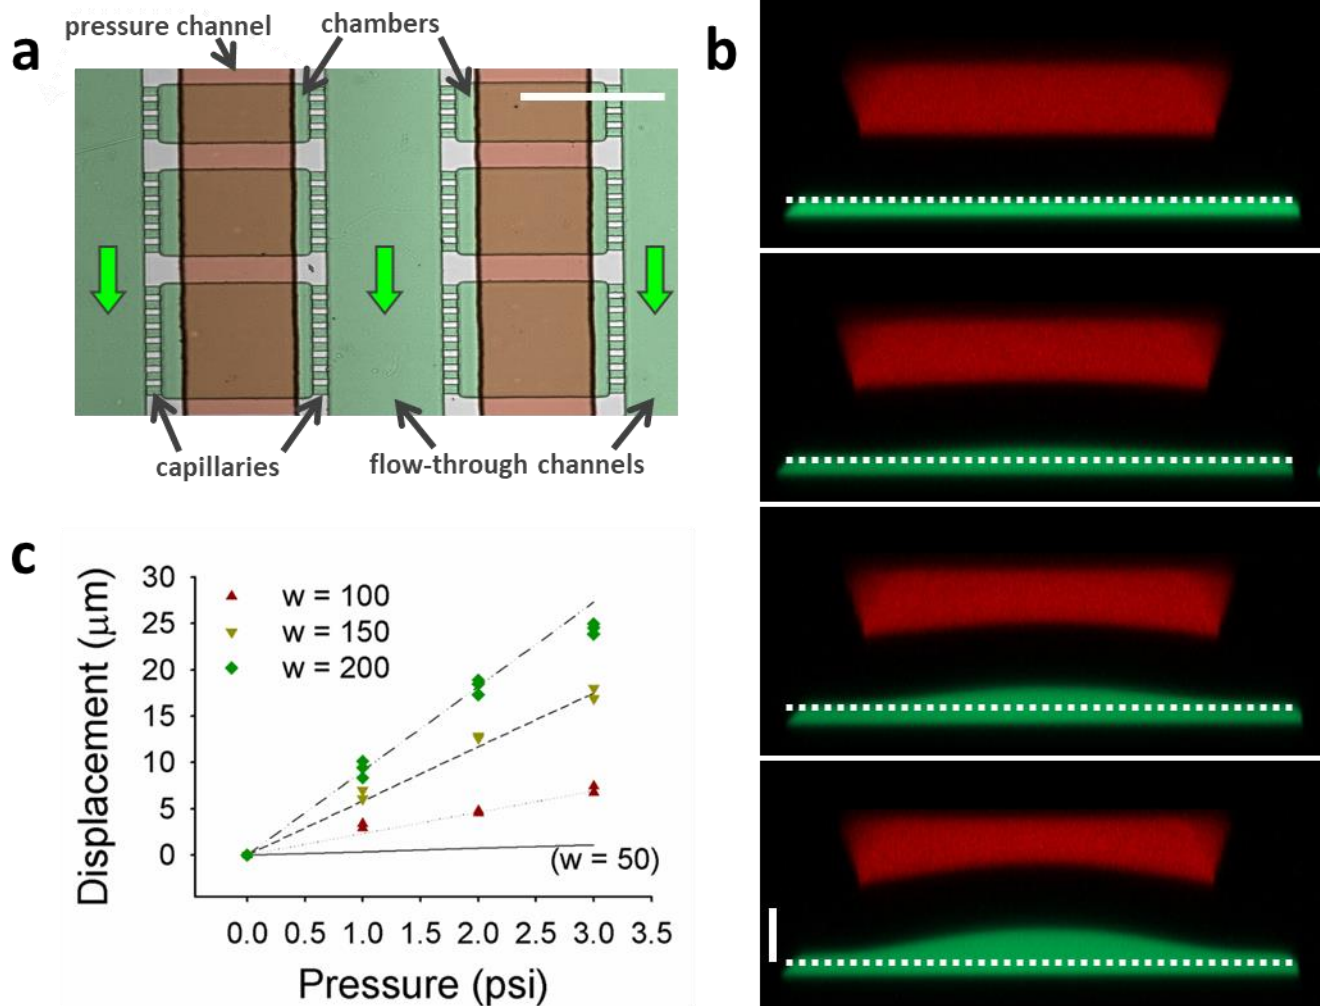

3

4 **Supplementary Figure 1. Microfluidic device calibration.** (a) A micrograph of a portion of the chamber

5 array in the microfluidics device. The chamber and flow-through channel layer has been highlighted in

6 green, while the overlaying channel layer used to create the deformable chamber roof has been highlighted

7 in red. Scale bar, 200  $\mu\text{m}$ . (b) The deformation of a chamber roof increases as progressively elevated

8 uniform external pressure is applied to the chamber layer during calibration, as visualized with 3-D

9 reconstruction from confocal imaging, using solutions of fluorescent dyes Alexa Fluor 488 (green;

10 chamber layer) and Alexa Fluor 555 (red; pressure channel). Scale bar, 20  $\mu\text{m}$ . (c) A representative

11 calibration plot is obtained by plotting the displacement of the thin membrane as a function of the applied

12 external hydrostatic pressure. The lines super-imposed onto the data points are obtained from the analytic

13 and simulation analysis of the corresponding thin plate deflection theory, described in the Methods  
14 section.

15

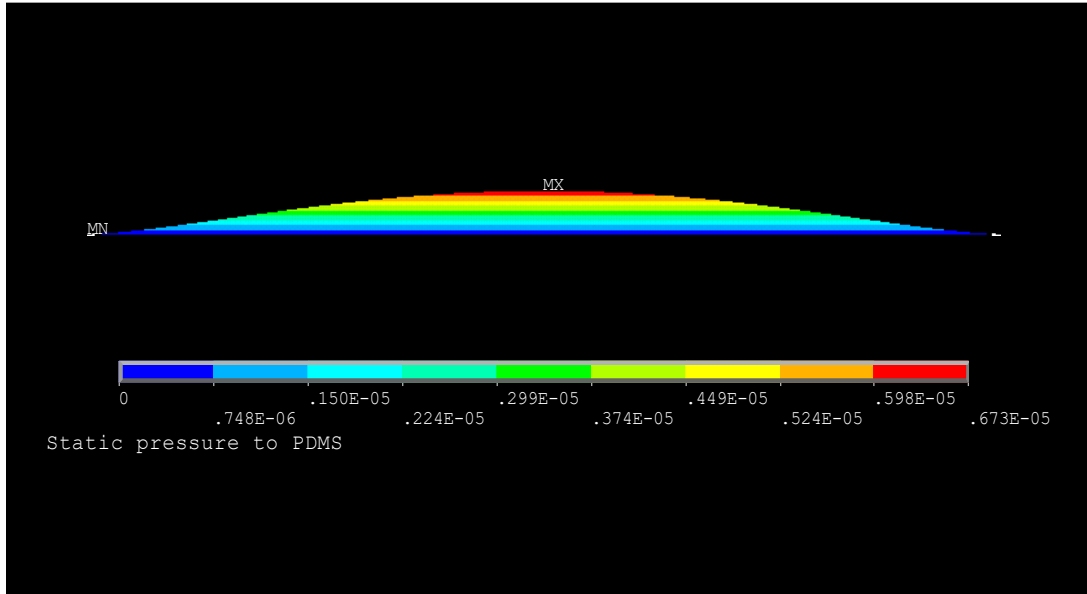

16

17 **Supplementary Figure 2. Simulation of membrane deformation and stress profile.** A numerical  
18 simulation of the deformation of a membrane that is 20  $\mu\text{m}$  thick, 150  $\mu\text{m}$  wide and 160  $\mu\text{m}$  tall (long),  
19 and has the elastic modulus (corresponding to that of PDMS) of  $E = 0.35\text{MPa}$ , under 1 psi pressure. The  
20 resulting membrane deformation (deflection) is approximately 5  $\mu\text{m}$ . The normalized stress values are  
21 color coded. The results are fully consistent with the predictions of the plate deformation theory  
22 provided in the text. The simulation was performed in ANSYS 10.0.

23

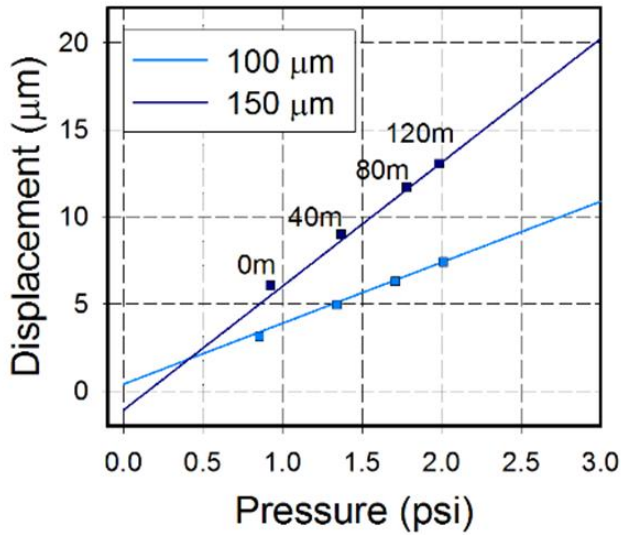

24

25 **Supplementary Figure 3. Pressure dynamics as a result of confined growth.** The dynamics of  
 26 pressure increase generated by expanding *E. coli* colonies confined in chambers of different widths. The  
 27 values are estimated from the corresponding deformation of PDMS membranes forming the roofs of the  
 28 microchambers. Pressure values were determined from the displacements of the membrane in z-  
 29 direction at time points 0 min, 40 min, 80 min, 120 min of growth after the chamber was filled with  
 30 *E. coli* cells. The calibration procedure is described in the text and shown in Supplementary Fig. 1c. The  
 31 results were independently validated by confocal imaging experiments at randomly selected time points,  
 32 as shown in Supplementary Fig. 6. The measurements were performed in 100 μm- and 150 μm -wide  
 33 chambers.

34

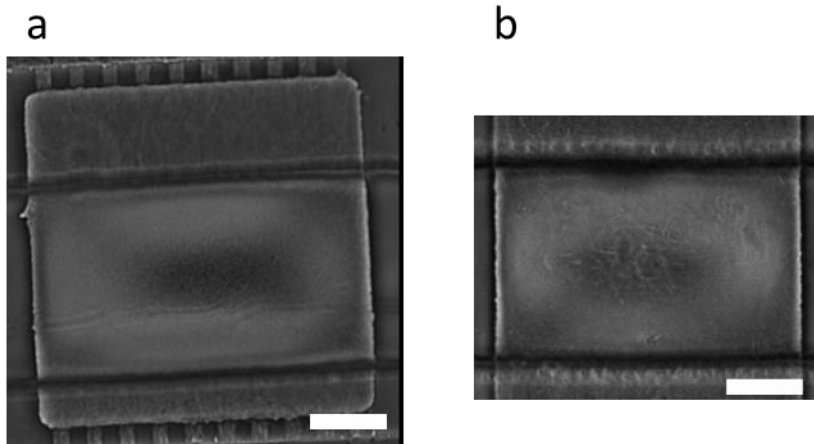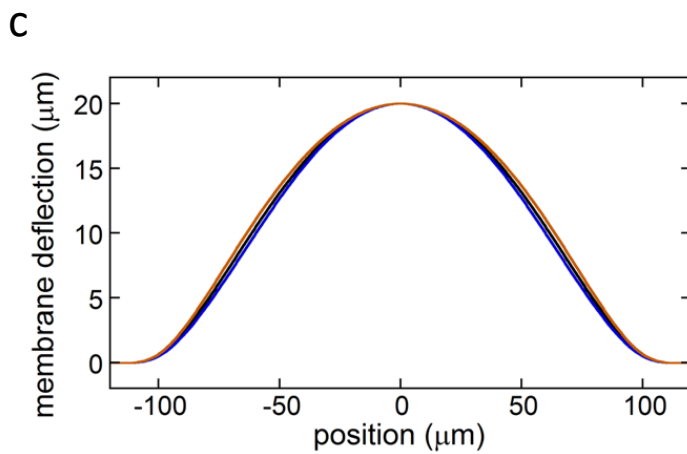

35

36 **Supplementary Figure 4. Comparison of chambers with pressure channel alignment offset. (a,b)**

37 Phase contrast images of (a) a chamber with a shift in the alignment of the pressure channel above it,  
 38 and (b) a chamber with the symmetrically aligned pressure channel. Note the ‘lens effect’ of the

39 deforming roof of the expanding chamber, indicating the area of the maximum membrane deflection at  
 40 the centers of the regions of the overlap of the pressure channel and the chamber. Scale bars, 40 μm. (c)

41 Simulations of the deformation of a 15 μm thick membrane on top of a 200x200 μm, 6 μm deep  
 42 chamber, with various pressure distributions applied. We considered 3 different spatial distributions of  
 43 the pressure: an even distribution over the entire 200x200 μm square (black curve), 2x greater pressure  
 44 on the central 100x100 μm square than on the rest of the membrane (red curve), and 2x smaller pressure

45 on the central  $100 \times 100 \mu\text{m}$  square than on the rest of the membrane (blue curve). The actual values of  
46 the pressure were normalized to achieve the same membrane deformation of  $20 \mu\text{m}$  in the middle.

47

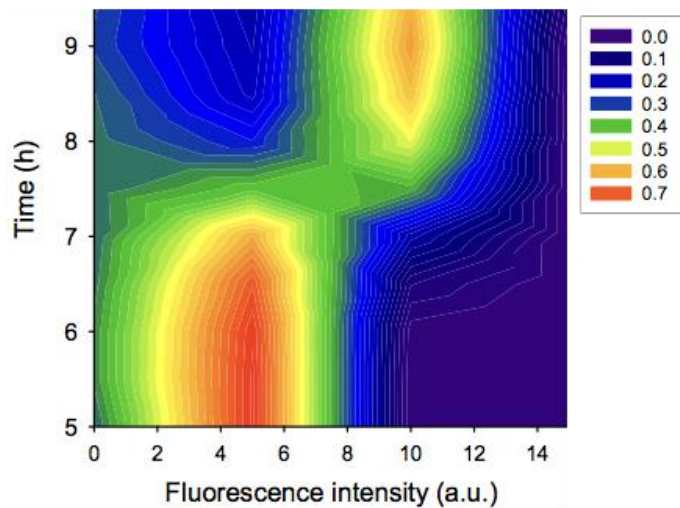

48

49 **Supplementary Figure 5. Stress response dynamics in an expanding colony.** The data from an  
50 experiment similar to the one shown in Fig. 1d, with the re-normalized range of the arbitrary units for  
51 the fluorescence intensity values and a different window of measurement with respect to the onset of the  
52 chamber deformation (around 7 hrs. on this example). The data were converted into the contour plot by  
53 interpolating and smoothing across individual histograms. The results suggest a rapid onset and  
54 equilibration with a new steady fluorescence response level.

55



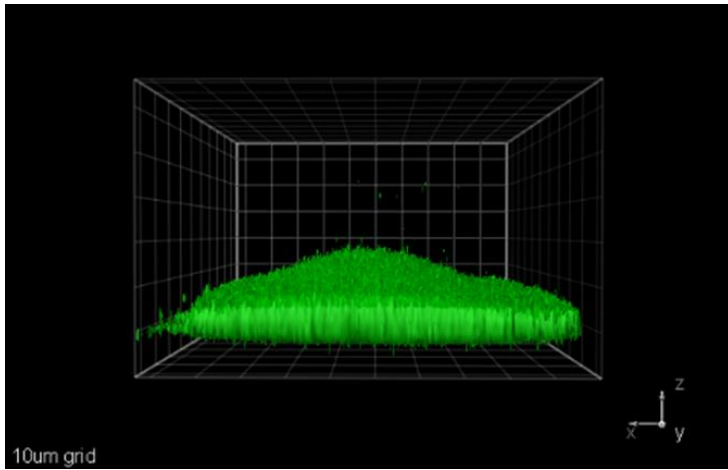

56

57 **Supplementary Figure 6. 3D reconstruction of colony.** A 3D reconstruction of a confocal z-stack of  
58 an *E. coli* colony expressing GFP under the *rpoH* promoter control within a fully deformed chamber.

59

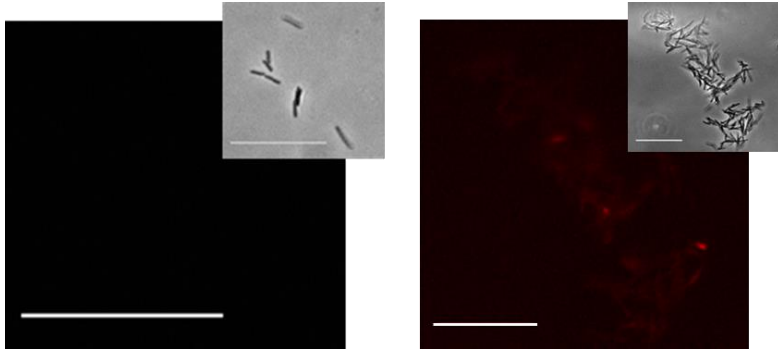

60

61 **Supplementary Figure 7. EPS staining in sparse cells.** Epi-fluorescence imaging shows

62 exopolysaccharide (EPS) expression in individual cells (left) or cell clumps (right), as indicated by

63 rhodamine-labeled concanavalin A stain. Scale bar, 10  $\mu\text{m}$

64

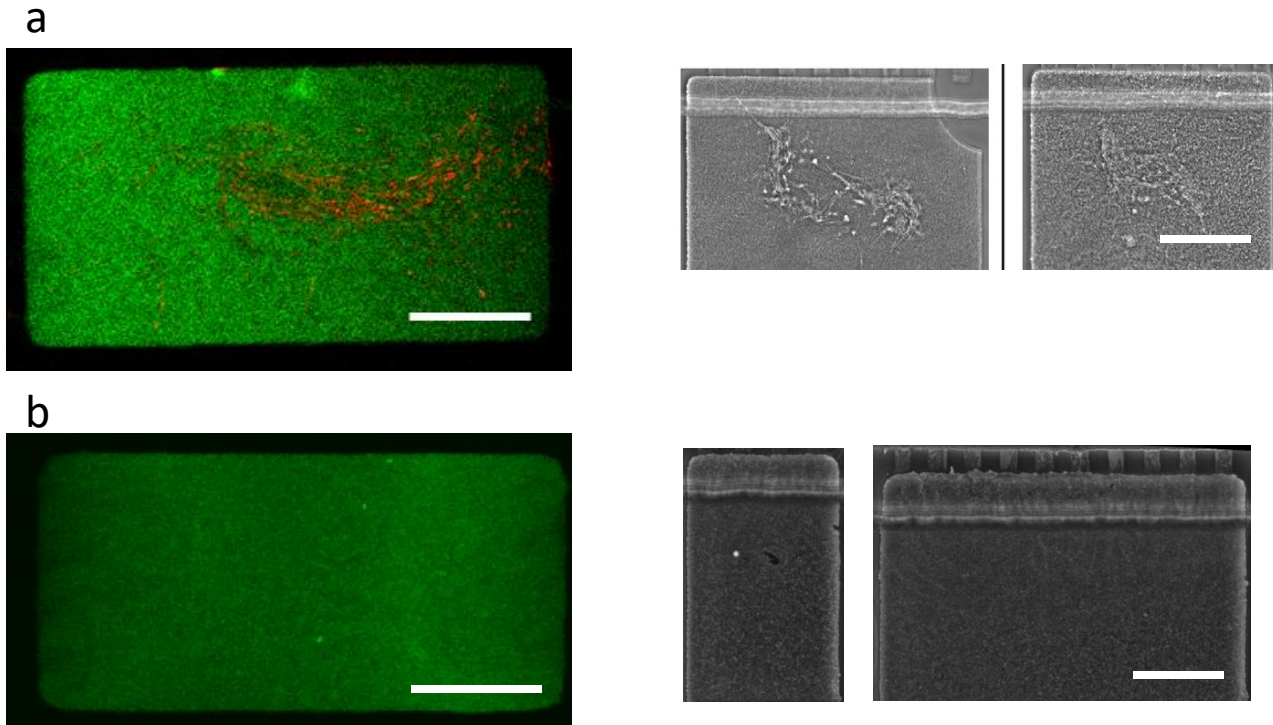

65

66 **Supplementary Figure 8. Direct application of pressure. (a)** Examples of GFP (under the control of  
 67 the *rpoH* promoter) and rhodamine-labeled concanavalin A staining, and solid structure growth in  
 68 growth chambers following their partial expansion with a transient inward membrane (chamber roof)  
 69 deformation. The inward deformation was performed by increasing the pressure in the pressure channel  
 70 to approximately 1 psi at the point of initiation of the outward deformation of the chamber roof,  
 71 performed for 15 min. This was the time point immediately following the filling of the chamber with the  
 72 expanding *E. coli* colony. The staining was performed after an additional hour of colony expansion  
 73 following the inward deformation. The central region, where the staining is concentrated as visualized  
 74 using confocal imaging, is the area of the highest inward membrane deformation, expected to lead to the  
 75 highest amount of stress onto the cells. The even distribution of GFP is indicative of the additional input  
 76 of the self-induced stress during the one hour of outward colony expansion. **(b)** The early stages of  
 77 outward roof deformation as a result of cell growth, without initial roof invagination, also results in  
 78 uniform GFP expression. Scale bars, 50  $\mu\text{m}$ .

79

a

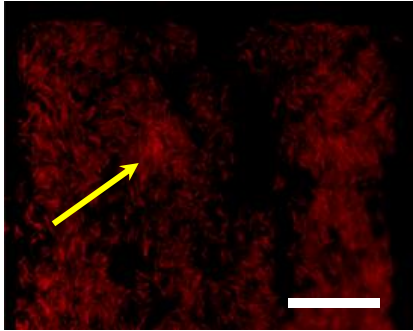

b

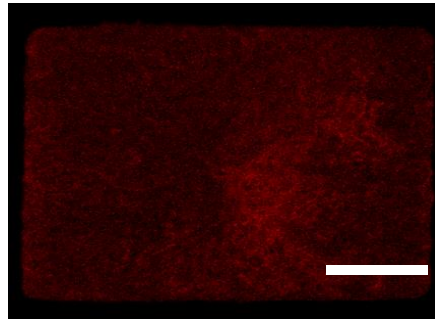

80

81 **Supplementary Figure 9. EPS staining after direct pressure application.** (a) An example of a  
82 confocal image using rhodamine-labeled concanavalin A stain in a 150  $\mu\text{m}$  -wide chamber following its  
83 complete expansion after a transient inward membrane (chamber roof) deformation. Note both the  
84 expected ‘butterfly’ pattern and the unusual increased staining at the central region, indicated by the  
85 arrow. The central region is the area of the highest inward membrane deformation, expected to lead to  
86 the highest amount of stress onto the cells. (b) Control stain with rhodamine-labeled concanavalin A at  
87 the time when the colony has reached a fully packed (dense) state, but has not yet developed the self-  
88 generated stress and initiated outward roof deformation, demonstrated minimal staining as well as the  
89 lack of localization. Scale bars, 50  $\mu\text{m}$ .

90

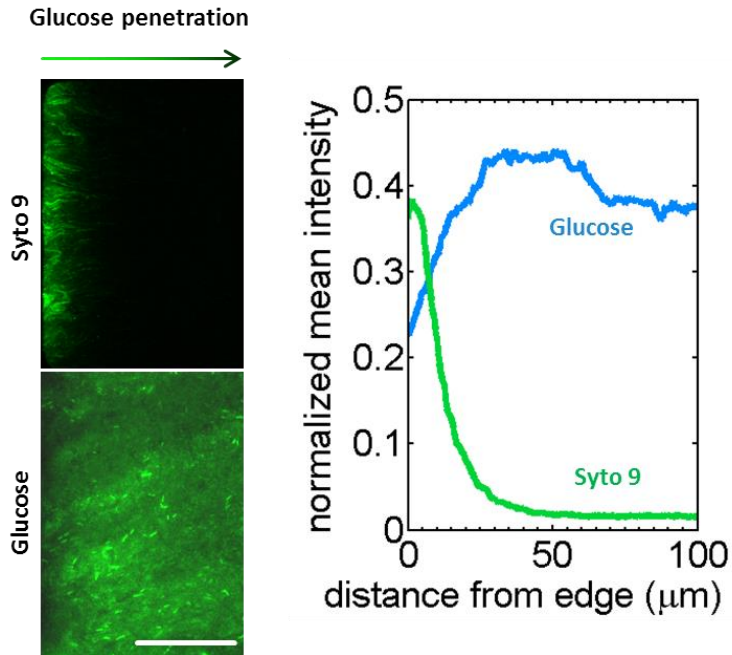

91

92 **Supplementary Figure 10. Nutrient gradient formation within filled chamber.** Detection of a  
 93 nutrient gradient from the supply towards the interior of the chamber, with a cAMP-CRP (cAMP  
 94 receptor protein) level reporting strain expressing at low levels in regions proximal to the exits, and  
 95 increasing in expression towards the interior of the chamber until a maximal level is reached. Scale bar,  
 96 50  $\mu\text{m}$ .

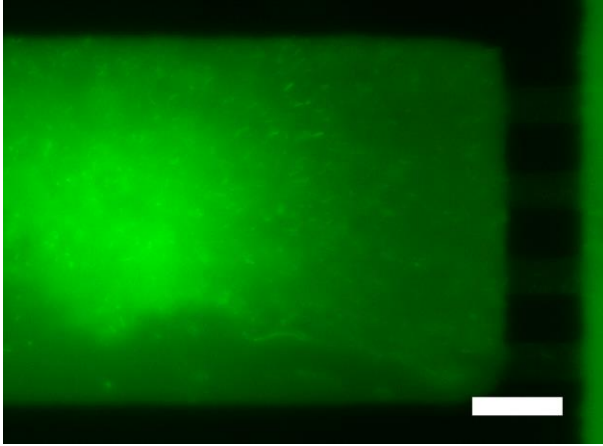

97

98 **Supplementary Figure 11. Dye penetration indicates penetration barrier is selective.** Negatively-  
99 charged Alexa Fluor 488 penetrated the chamber in an uninhibited fashion, exhibiting higher levels of  
100 intensity towards the interior of the chamber due to the increase in volume as the roof was deformed.

101 Scale bar, 25  $\mu\text{m}$ .

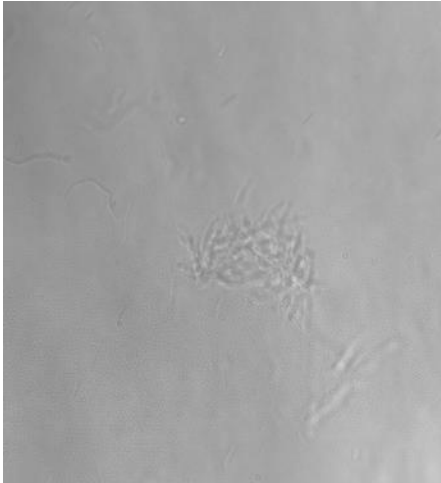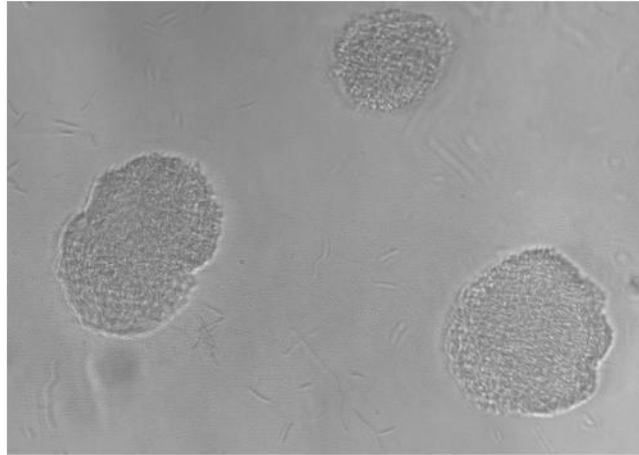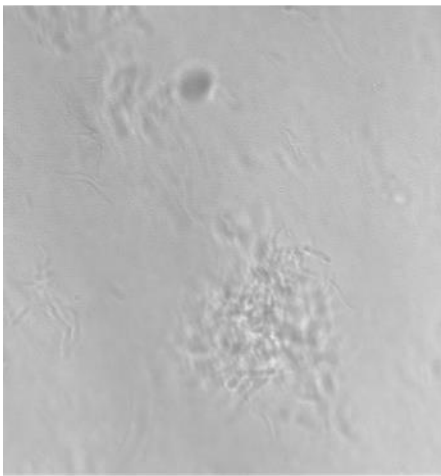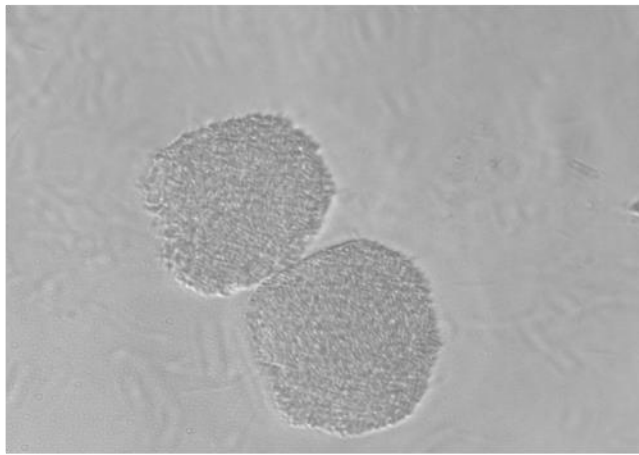

0.5% hydrogel

1 % hydrogel

102

103 **Supplementary Figure 12. Colony growth within hydrogels of various concentrations.** Growth of  
104 colonies in 0.5% hydrogel resulted in more dispersed and less dense colonies, with fewer cells, whereas  
105 1% hydrogels resulted in dense microcolonies.

106

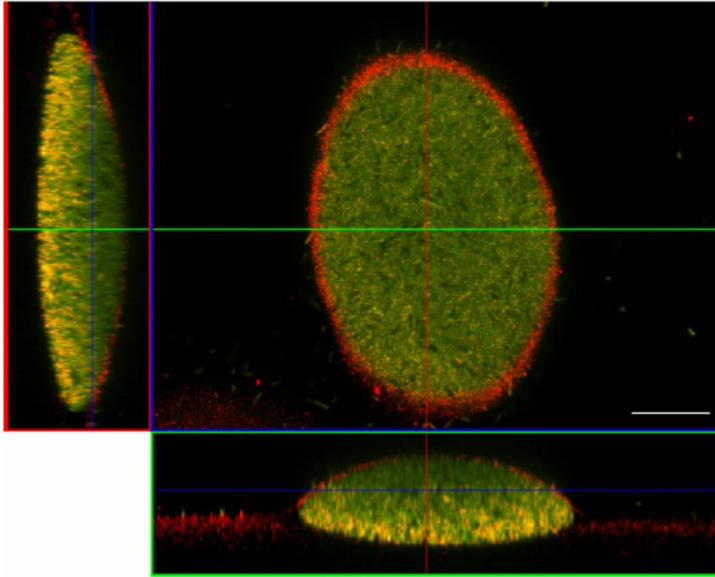

107

108

**Supplementary Figure 13. 3D reconstruction of colony in hydrogel.** Different cross-sections of a

109

colony grown under conditions similar to those shown in Fig. 4b and stained for EPS using rhodamine-

110

labeled concanavalin A. The colony was grown close to the wall of the Petri Dish containing the gel,

111

thus making it asymmetric, and increasing the effective stiffness of the gel on one side of colony. This

112

side displays a more intense EPS staining both at the periphery and inside the colony. Scale bar, 20  $\mu\text{m}$ .

113



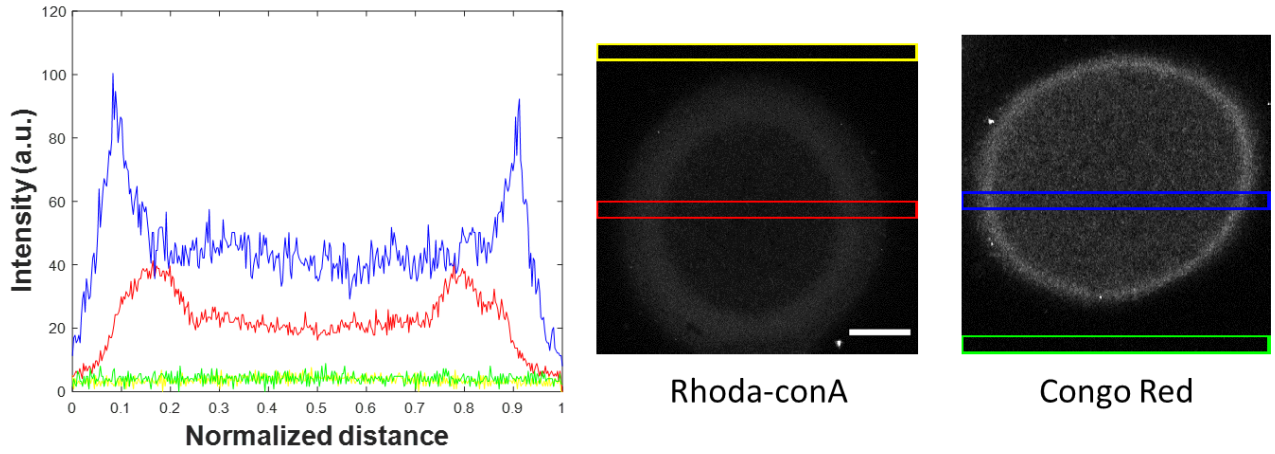

114

115 **Supplementary Figure 14. Expression of EPS and Curli in hydrogel colonies.** Analysis of the  
 116 micrographs shown in Fig. 4b reveals staining within the interior of microcolonies, demonstrating the  
 117 expression of EPS and curli inside of the microcolony as well as the ability of the stains to penetrate in.  
 118 Analysis was performed by averaging the intensities within the color-coded box regions along the y-axis  
 119 and normalizing the x-axis from 0 to 1. Scale bar, 40  $\mu\text{m}$ .

120

121

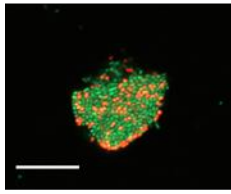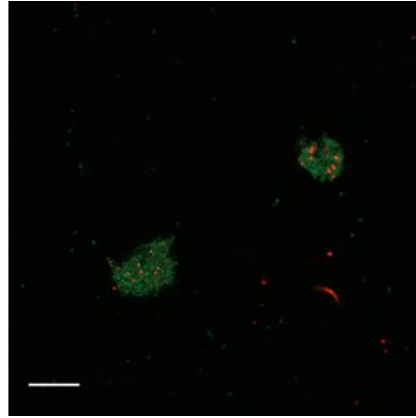

122

123 **Supplementary Figure 15. Limited antibiotic susceptibility in small colonies.** Confocal images of  
124 colonies of *E. coli* cells expressing GFP under the control of the *rpoH* promoter forming within the  
125 PuraMatrix gel (1%). 6 hrs. of growth followed by a 15 min. long exposure to 10  $\mu\text{g}/\text{mL}$  ampicillin and  
126 propidium iodide staining showed that many of cells remained intact after the antibiotics treatment. Note  
127 the induction of stress response and limited antibiotic susceptibility even at this early stage of colony  
128 development. Scale bar, 20  $\mu\text{m}$ .

129

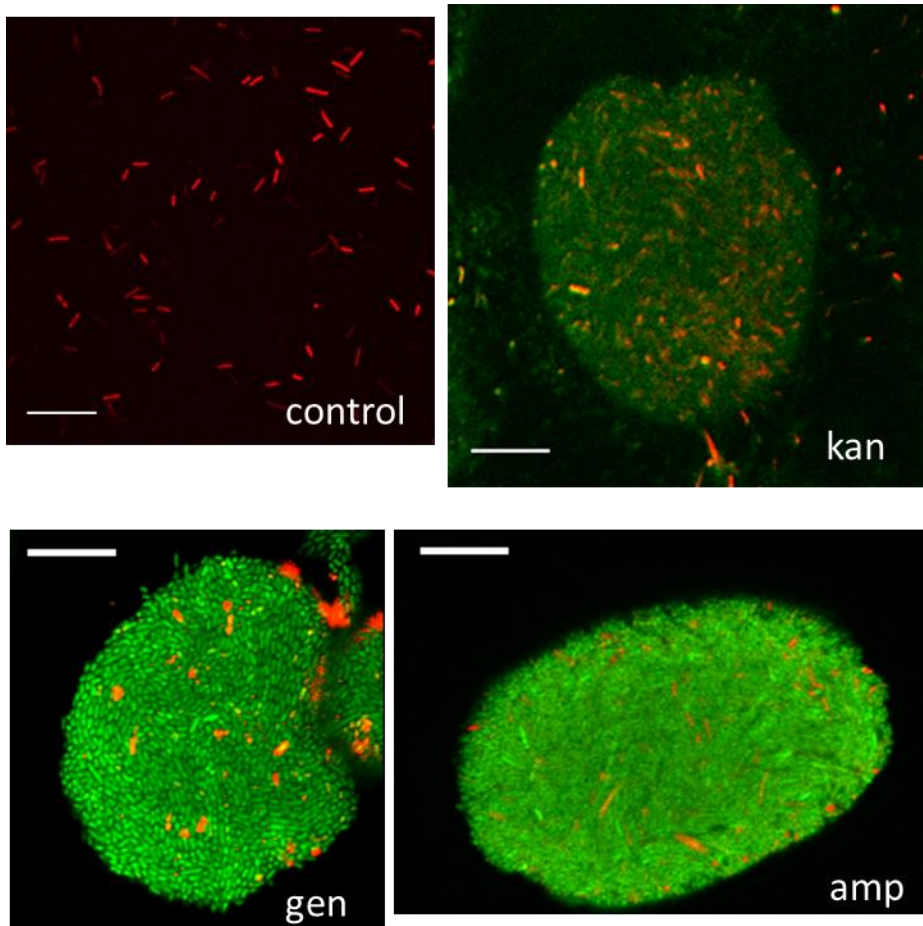

130

131

132

133

134

**Supplementary Figure 16. Decreased antibiotic susceptibility in hydrogel colonies.** Comparison between bulk and hydrogel (6 hr) cultures after exposure to 20  $\mu\text{g/ml}$  of kanamycin (JM105), 20  $\mu\text{g/ml}$  of gentamicin (CFT073), and 10  $\mu\text{g/ml}$  of ampicillin (CFT073), and stained with propidium iodide. Scale bars, 20 $\mu\text{m}$ .
