# Supplementary material for: Self-induced mechanical stress can trigger biofilm formation in uropathogenic Escherichia coli
Source: PubMed Central journal article supplement (PMC6173693; doi:10.1038/s41467-018-06552-z), 2018-10-05
Supplement: 41467_2018_6552_MOESM2_ESM.pdf [file 41467_2018_6552_MOESM2_ESM.pdf]

## **Description of Additional Supplementary Files**

**File Name:** Supplementary Movie 1

**Description:** 3D rendering of the microfluidic device. The movie shows a 3D render of the chamber array arrangement, with the overlapping pressure channel.

**File Name:** Supplementary Movie 2

**Description:** Deformation of chamber membrane from colony growth. The movie shows the deformation of the membrane (black area between blue (Alexa Fluor 647) and green (GFP-expressing *E. coli*) layers) as a result of colony expansion within confinement. Scale bar, 20  $\mu\text{m}$ .

**File Name:** Supplementary Movie 3

**Description:** Colony growth. The movie shows the time-lapse capture of colony growth within chamber. Scale bar, 40  $\mu\text{m}$ .

**File Name:** Supplementary Movie 4

**Description:** Z-scan of a full chamber with deformed membrane. The movie shows a confocal z-stack of a fully expanded chamber. Note the “butterfly shape” spatial distribution of GFP as a reporter of *rpoH* expression. Scale bar, 40  $\mu\text{m}$ .

**File Name:** Supplementary Movie 5

**Description:** Simulation of colony in chamber. The movie shows the model simulation of growth and stress response profile within growth chamber with deformable roof.

**File Name:** Supplementary Movie 6

**Description:** Simulation of colony in hydrogel. The movie shows the model simulation of growth and stress response profile within hydrogel
